# Supplementary material for: Do Curriculum-Based Social and Emotional Learning Programs in Early Childhood Education and Care Strengthen Teacher Outcomes? A Systematic Literature Review
Source: Int J Environ Res Public Health. 2020 Feb 7;17(3):1049. doi: 10.3390/ijerph17031049 (PMC7036843; doi:10.3390/ijerph17031049)
Supplement: Supplementary file 1 [file ijerph-17-01049-s001.pdf]

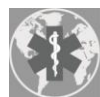

# Supplementary Materials: Do Curriculum-Based Social and Emotional Learning Programs in Early Childhood Education and Care Strengthen Teacher Outcomes? A Systematic Literature Review

**Table S1.** Characteristics of Included Studies.

| First Author (Year)                  | Country | Setting | Study Design                          | n Teacher (Child)            | Control                                | Intervention                      | Intervention Leader | SEL Program Duration                        | Training Component                                                             | Parent Component         |
|--------------------------------------|---------|---------|---------------------------------------|------------------------------|----------------------------------------|-----------------------------------|---------------------|---------------------------------------------|--------------------------------------------------------------------------------|--------------------------|
| Arda (2012)                          | Turkey  | P       | RT                                    | 7 (95)                       | BAU                                    | Preschool PATHS                   | T                   | 44 lessons/9 weeks                          | Teacher education before program, weekly training during implementation        | Not described            |
| Barnett (2008)                       | USA     | P       | RCT                                   | 18 classrooms (210)          | Curriculum developed by local teachers | Tools of the Mind                 | T                   | Embedded                                    | 4 days training, 30 min weekly classroom visits, 0.5 day and 5 x 1 hr meetings | Not described            |
| Cappella (2015)                      | USA     | K, G1   | SRT                                   | 120, 60 in K (~16.57/ class) | Literacy program                       | INSIGHTS                          | F, T                | Weekly lesson (45 min)/10 weeks             | 10 x 2-hr sessions                                                             | 10 x 2-hr sessions       |
| Domitrovich (2009)<br>Bierman (2014) | USA     | HS      | RCT                                   | 84 (246)                     | BAU                                    | Preschool PATHS (as part of REDI) | T                   | 33 weekly lessons plus extension activities | 4 days training, weekly in-class support                                       | Not described            |
| Fishbein (2016)                      | USA     | K       | RCT                                   | 4 schools (327)              | BAU                                    | Preschool PATHS                   | T                   | 2 lessons per week (20 min)/22 weeks        | 2-day training, weekly consultation (2-3 hr) in each classroom                 | Frequent updates         |
| Gunter (2012)                        | USA     | P       | QE<br>CG, IG, IG+2<br>booster lessons | 4 (84)                       | BAU                                    | Strong Start Pre-K                | T                   | 2 lessons per week/6 weeks                  | 1 hr training and Strong-Start manuals                                         | Bulletin for each lesson |



|                |     |              |                                                                                                                                                   |           |                                                                                                                                  |                                                                                                       |   |                            |                                                                                                                                                                         |                                                       |
|----------------|-----|--------------|---------------------------------------------------------------------------------------------------------------------------------------------------|-----------|----------------------------------------------------------------------------------------------------------------------------------|-------------------------------------------------------------------------------------------------------|---|----------------------------|-------------------------------------------------------------------------------------------------------------------------------------------------------------------------|-------------------------------------------------------|
|                |     |              |                                                                                                                                                   |           | High Scope,<br>Trust-Based<br>Relational<br>Intervention,<br>SEL                                                                 |                                                                                                       |   |                            |                                                                                                                                                                         |                                                       |
| Jackman (2019) | USA | HS -P        | RCT                                                                                                                                               | 27 (262)  | 5-day<br>relationship<br>building course,<br>daily activities<br><br>Parent training<br>on relationship<br>building<br>practices | OpenMind (OM)<br>Curriculum                                                                           | T | Embedded                   | 5-day mindfulness<br>training, meditation<br>for 20 mins/day                                                                                                            | 3 x 2hr<br>mindfulness-<br>based training<br>sessions |
| Landry (2014)  | USA | CC           | RCT<br>CG, RECC,<br>RECC<br>+ explicit<br>social-<br>emotional<br>activities                                                                      | 65 (542)  | BAU                                                                                                                              | Responsive Early<br>Childhood<br>Curriculum (RECC)<br>plus explicit<br>social-emotional<br>activities | T | Daily, 36 weeks            | Training (4 x 6-7 hr),<br>weekly coaching<br>support, teacher<br>manuals                                                                                                | Parent<br>newsletters                                 |
| Lonigan (2015) | USA | P, HS,<br>PS | CRT<br><br>CG, academic<br>skills focused<br>curriculum<br>with explicit<br>SEL, academic<br>skills focused<br>curriculum<br>with implicit<br>SEL | 110 (855) | BAU                                                                                                                              | Preschool PATHS                                                                                       | T | 1-2 times per<br>week/year | Teacher manuals, 8-<br>day training, explicit<br>group received 3 half<br>day training sessions<br>focused on SE<br>activities, 9 monthly<br>coaching sessions<br>(3hr) | Not described                                         |
| Pickens (2009) | USA | P            | CT<br>Pre-post<br>measures<br>relating to<br>teacher<br>knowledge                                                                                 | 21 (296)  | BAU                                                                                                                              | The Peace<br>Education<br>Foundation (PEF)<br>Socio-Emotional<br>Development<br>Programme             | T | Year                       | 2 days training, 4-6<br>technical assistance<br>visits                                                                                                                  | 3-hr workshop                                         |



|                         |        |           |                                                       |                                                                                                                  |                                              |                                                                             |      |                                                                                                         |                                                                                                                                                                |                                                                |
|-------------------------|--------|-----------|-------------------------------------------------------|------------------------------------------------------------------------------------------------------------------|----------------------------------------------|-----------------------------------------------------------------------------|------|---------------------------------------------------------------------------------------------------------|----------------------------------------------------------------------------------------------------------------------------------------------------------------|----------------------------------------------------------------|
| Seyhan (2017)           | Turkey | P         | QE                                                    | 29 (565)                                                                                                         | BAU                                          | Preschool PATHS                                                             | T    | 33 lessons (15-20 min)/ 9 weeks                                                                         | Previous PATHS training, re-training, weekly support meetings                                                                                                  | Not described                                                  |
| Upshur (2017)           | USA    | HS, P     | CRT                                                   | 31(492)<br>Classrooms participated for 2 years                                                                   | Creative Curriculum or Head Start Frameworks | Second Step Early Learning Curriculum                                       | T    | Daily activity 5-7 mins, and integrated within other curriculum requirements                            | Year 1: 7 x monthly 2-hr training. Year 2: 5 group training sessions. Monthly visits including observation, coaching and written feedback, SSEL curriculum kit | Parent handouts                                                |
| Upshur (2013)           | USA    | CC        | CRT                                                   | Year 1: 30, Year 2 26. >50% teachers participated in both years (341)<br><br>Classrooms participated for 2 years | Creative Curriculum                          | Second Step Preschool/ Kindergarten Social/Emotional Learning curriculum    | T    | 4 lessons per week (15 min)/22 weeks                                                                    | Some participants attended workshop, 7 monthly (2 hr) training sessions in Year 1, 5 bi-monthly sessions in Year 2                                             | Four to six parent group sessions/yr                           |
| Vestal (2004)           | USA    | HS        | QE<br>Pre-post measures relating to teacher knowledge | 11 (64)                                                                                                          | BAU                                          | I Can Problem Solve                                                         | T    | 2 months                                                                                                | 13-session college-level course (40hr)                                                                                                                         | Not described                                                  |
| Webster-Stratton (2008) | USA    | HS, K, G1 | RCT                                                   | 153(1,768)                                                                                                       | Head Start and elementary school curriculum  | Incredible Years Dina Dinosaur Social Skills and Problem-Solving Curriculum | T, R | 2 lessons per week (15-20-min) followed by 20 minutes of small group skill practice/30 lessons in total | IY Teacher Training: 4 days (28 hours) of training spread across monthly workshops, manuals                                                                    | Letters, weekly homework for parents to complete with children |

*Note:* BAU=Business as usual, C-RCT = Cluster Randomised Controlled Trial, CRT=Classroom Randomised Trial, CC=Child Care, CG=Control Group, CT=Controlled Trial, F=Facilitator, G1= Grade 1, HS=Head Start, IG=Intervention Group, K=Kindergarten, P=Preschool, PS=Public School, QE=Quasi-Experimental, R=Researcher, RCT=Randomized Controlled Trial, RT=Randomized Trial, SRT= School Randomized Trial, T=Teacher.
